# Supplementary material
Source: MDPI journal article supplement (https://www.mdpi.com/2073-4352/11/5/512)
Supplement: s1 [file s1]

# The Reactivity of the Imine Bond within Polynuclear Nickel(II) Complexes

Magdalena Siedzielnik <sup>1</sup>, Dimitrios A. Pantazis <sup>2</sup>, Jakub Bruniecki <sup>1</sup>, Kinga Kaniewska-Laskowska <sup>1</sup> and Anna Dołęga <sup>1,\*</sup>

<sup>1</sup> Department of Inorganic Chemistry, Faculty of Chemistry, Gdansk University of Technology, Narutowicza 11/12, 80-233 Gdansk, Poland; magdalena.siedzielnik@pg.edu.pl (M.S.); s177099@student.pg.edu.pl (J.B.); kinga.kaniewska-laskowska@pg.edu.pl (K.K.-L.)

<sup>2</sup> Max-Planck-Institut für Kohlenforschung, Kaiser-Wilhelm-Platz 1, 45470 Mülheim an der Ruhr, Germany; dimitrios.pantazis@kofo.mpg.de

\* Correspondence: anndolega@pg.edu.pl

## Synthesis of Cubane **4**

The OV (0.076 g, 0.50 mmol) in methanol (2.0 mL) was added to the solution of Ni(NO<sub>3</sub>)<sub>2</sub>·6H<sub>2</sub>O (0.073 g, 0.25 mmol) in 2.0 mL of methanol. Subsequently 2-AP (0.023 g, 0.25 mmol) in methanol (2.0 mL) was introduced to the solution. After 15 minutes of stirring, Et<sub>3</sub>N (0.07 mL, 0.50 mmol) was added to the clear yellow-green solution. After ten minutes yellow-green precipitate began to form. The precipitate was collected after 15 minutes of further stirring. Yield 0.019 g (0.018 mmol, 29%). Elemental analysis: calcd. for C<sub>40</sub>H<sub>56</sub>Ni<sub>4</sub>O<sub>20</sub>: C: 44.01; H: 5.17, found: 42.51; H: 5.03. The disagreement between the calculated and measured value of EA may be caused by the replacement of methanol by water in some of the cubane molecules. Crystals for X-ray diffraction analysis were obtained at RT by slow evaporation of the remaining solvent. It must be noted that the cubane **4** would also crystallize from the residual solutions of the syntheses described in the manuscript in 2.1.2.1–2.1.2.3. Cubane **4'** was found in the residue after the synthesis of **1**. The methanol in **4'** is partly substituted by ethanol (on the basis of X-ray data).

**Table S1.** Crystallographic data for cubane **4** and **4'** (T = 120 K).

| Complex                                    | <b>4</b>                                                        | <b>4'</b>                                                       |
|--------------------------------------------|-----------------------------------------------------------------|-----------------------------------------------------------------|
| Empirical formula                          | C <sub>40</sub> H <sub>56</sub> Ni <sub>4</sub> O <sub>20</sub> | C <sub>42</sub> H <sub>58</sub> Ni <sub>4</sub> O <sub>20</sub> |
| Formula weight                             | 1091.68                                                         | 1117.72                                                         |
| Wavelength [Å]                             | 0.71073                                                         | 1.54186                                                         |
| Crystal system                             | Tetragonal                                                      | Tetragonal                                                      |
| Space group                                | <i>I</i> 4 <sub>1</sub> / <i>a</i>                              | <i>I</i> 4 <sub>1</sub> / <i>a</i>                              |
| <i>a</i> (Å)                               | 21.9977(7)                                                      | 22.2276(11)                                                     |
| <i>b</i> (Å)                               | 21.9977(7)                                                      | 22.2276(11)                                                     |
| <i>c</i> (Å)                               | 9.4996(3)                                                       | 9.5788(6)                                                       |
| $\alpha$ (°)                               | 90.00                                                           | 90.00                                                           |
| $\beta$ (°)                                | 90.00                                                           | 90.00                                                           |
| $\gamma$ (°)                               | 90.00                                                           | 90.00                                                           |
| <i>V</i> (Å <sup>3</sup> )                 | 4596.8(3)                                                       | 4732.6(6)                                                       |
| <i>Z</i>                                   | 4                                                               | 4                                                               |
| <i>D<sub>c</sub></i> (g cm <sup>-3</sup> ) | 1.577                                                           | 1.569                                                           |
| $\mu$ (mm <sup>-1</sup> )                  | 1.69                                                            | 2.45                                                            |
| <i>F</i> (000)                             | 2272                                                            | 2328                                                            |
| Reflection collected                       | 28673                                                           | 16748                                                           |
| Unique reflections                         | 2255                                                            | 2134                                                            |

| Parameters            | 151     | 161     |
|-----------------------|---------|---------|
| $R_{\text{int}}$      | 0.046   | 0.071   |
| GOOF                  | 1.041   | 1.07    |
| $R_1[I > 2\sigma(I)]$ | 0.0343  | 0.0685  |
| w $R_2$ (all data)    | 0.0891  | 0.1187  |
| CCDC number           | 2072194 | 2072195 |

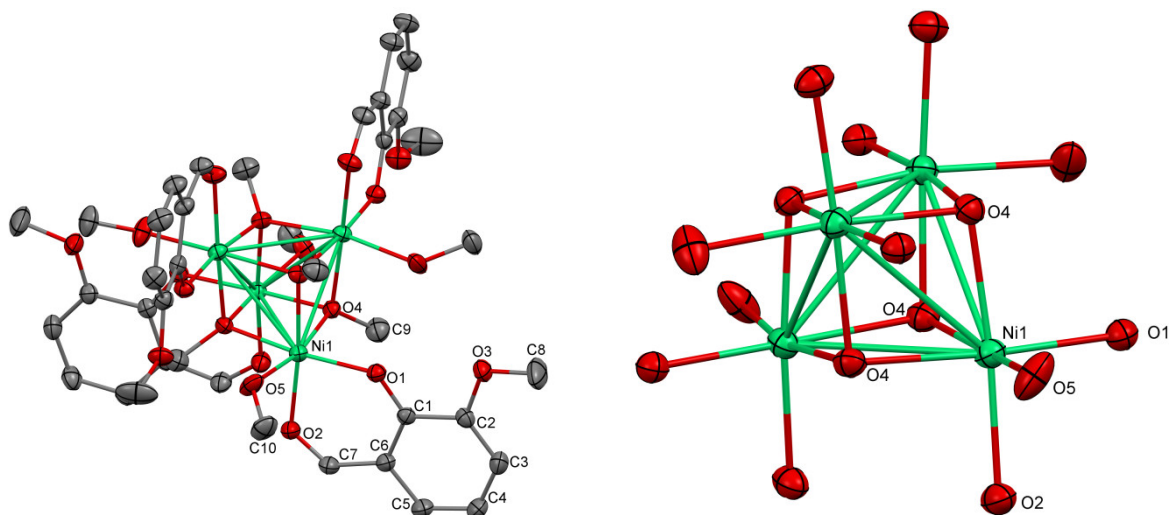

**Figure S1.** Molecular structures of **4**. Numbering given for the independent part. Important bond lengths/distances [Å]: Ni1–O1 2.0059(19); Ni1–O2 2.028(2); Ni1–O4 2.0355(19); Ni1–O4<sup>i</sup> 2.0406(19); Ni1–O4<sup>ii</sup> 2.0593(19); Ni1–O5 2.096(2); Ni1–Ni1<sup>i</sup> 3.0659(6); Ni1–Ni1<sup>ii</sup> 3.0872(6); <sup>i</sup>  $y + 1/4, -x + 3/4, -z + 3/4$ ; <sup>ii</sup>  $-x + 1, -y + 1/2, z$ .

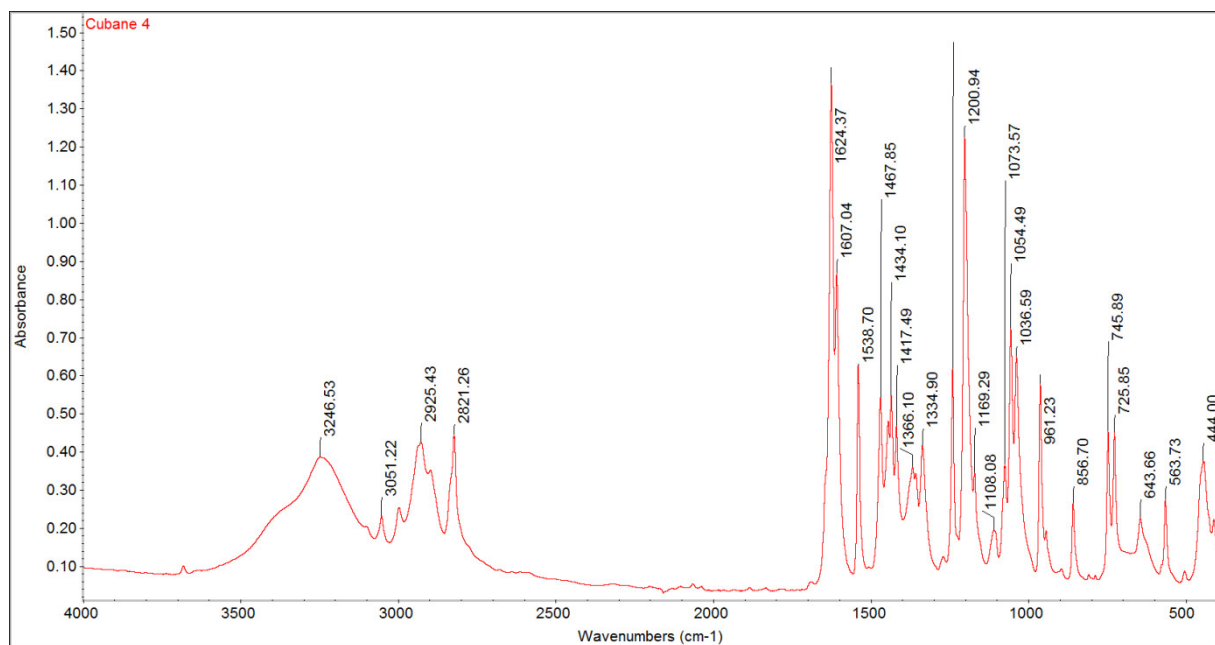

**Figure S2.** FT-IR spectrum of **4**.

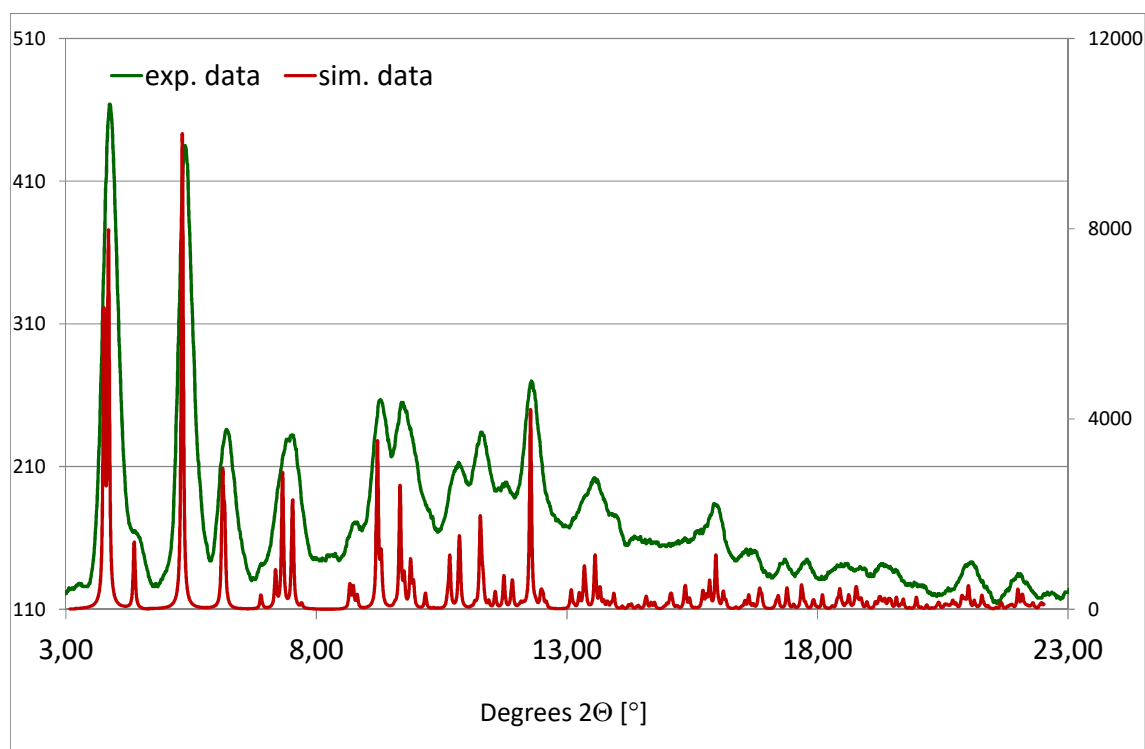

(a)

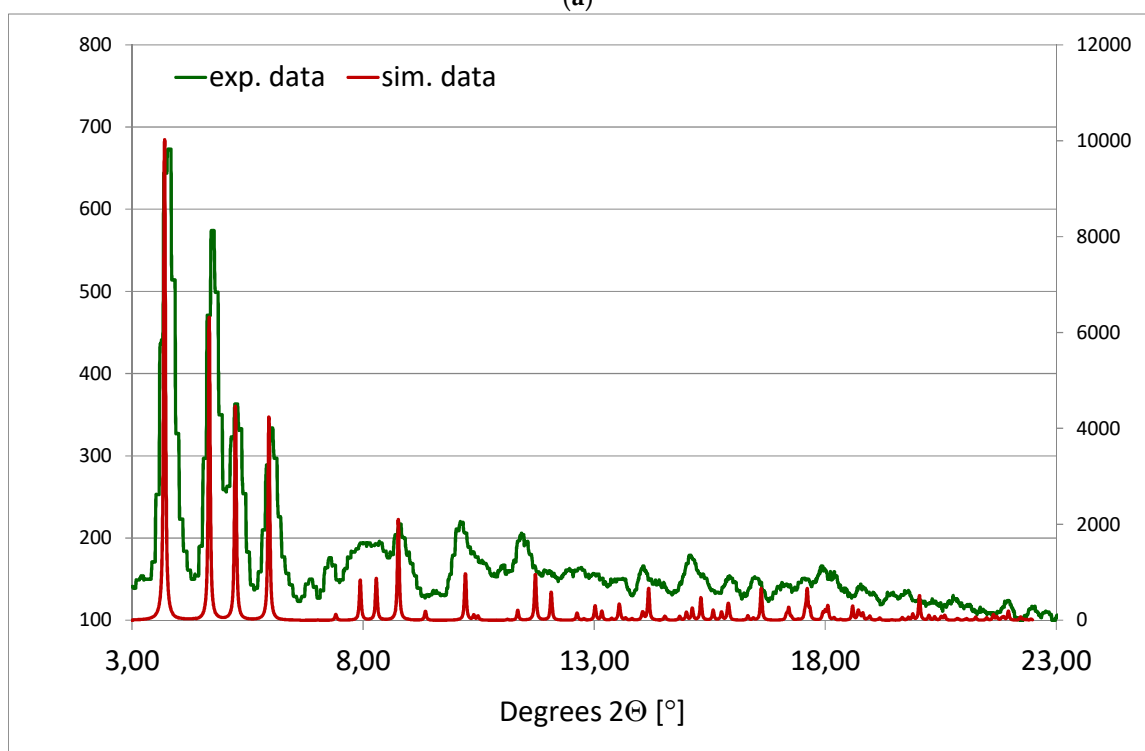

(b)

**Figure S3.** XRD powder spectra of (a) **3** and (b) **4**. Simulated spectra were calculated with Mercury and re-calculated to Mo  $K\alpha$  using the Bragg equation (the Default calculation in Mercury returns the values for Cu  $K\alpha$ ).

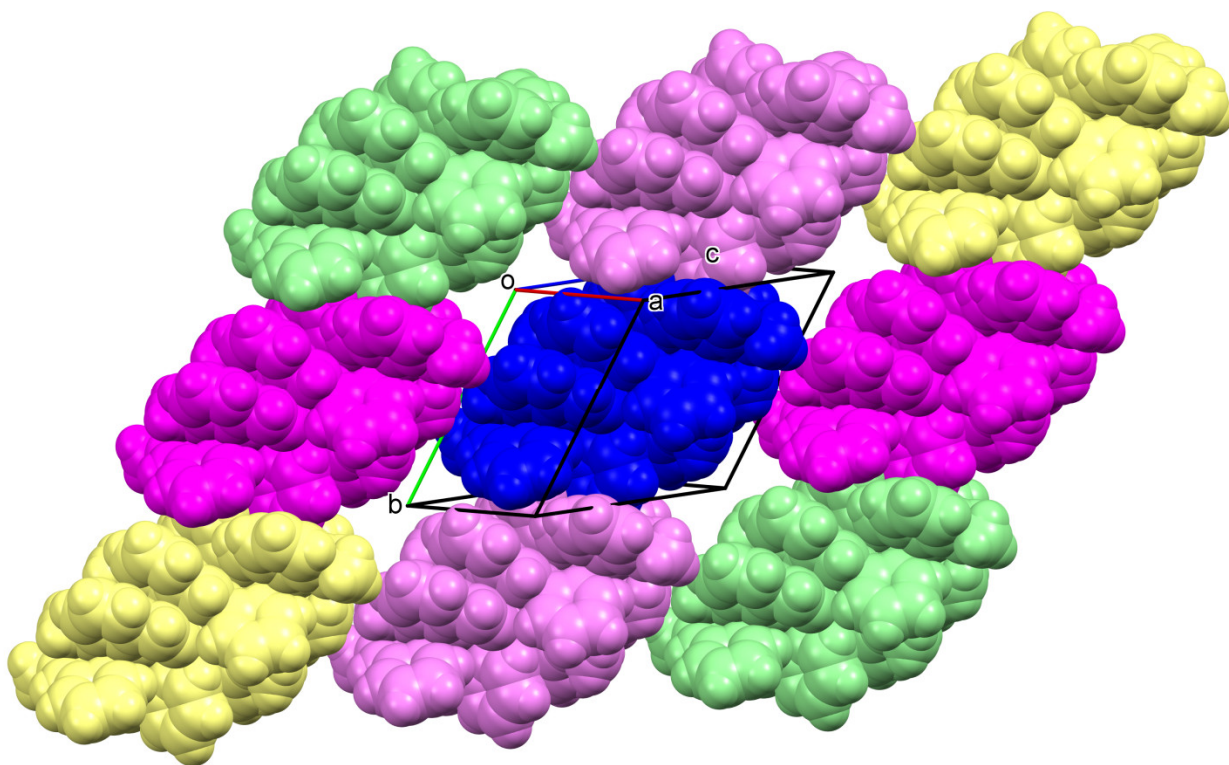

**Figure S4.** Crystal packing of **1**

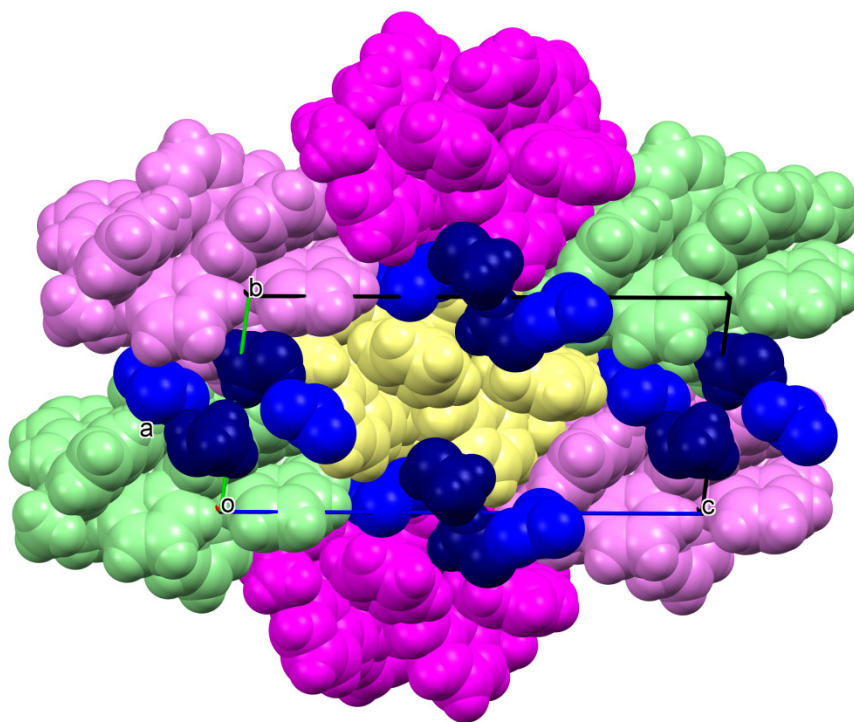

**Figure S5.** Crystal packing of **2**. Darker blue—methanol, lighter blue—nitrate.

# <sup>1</sup>H NMR DATA of isolated Ni complexes

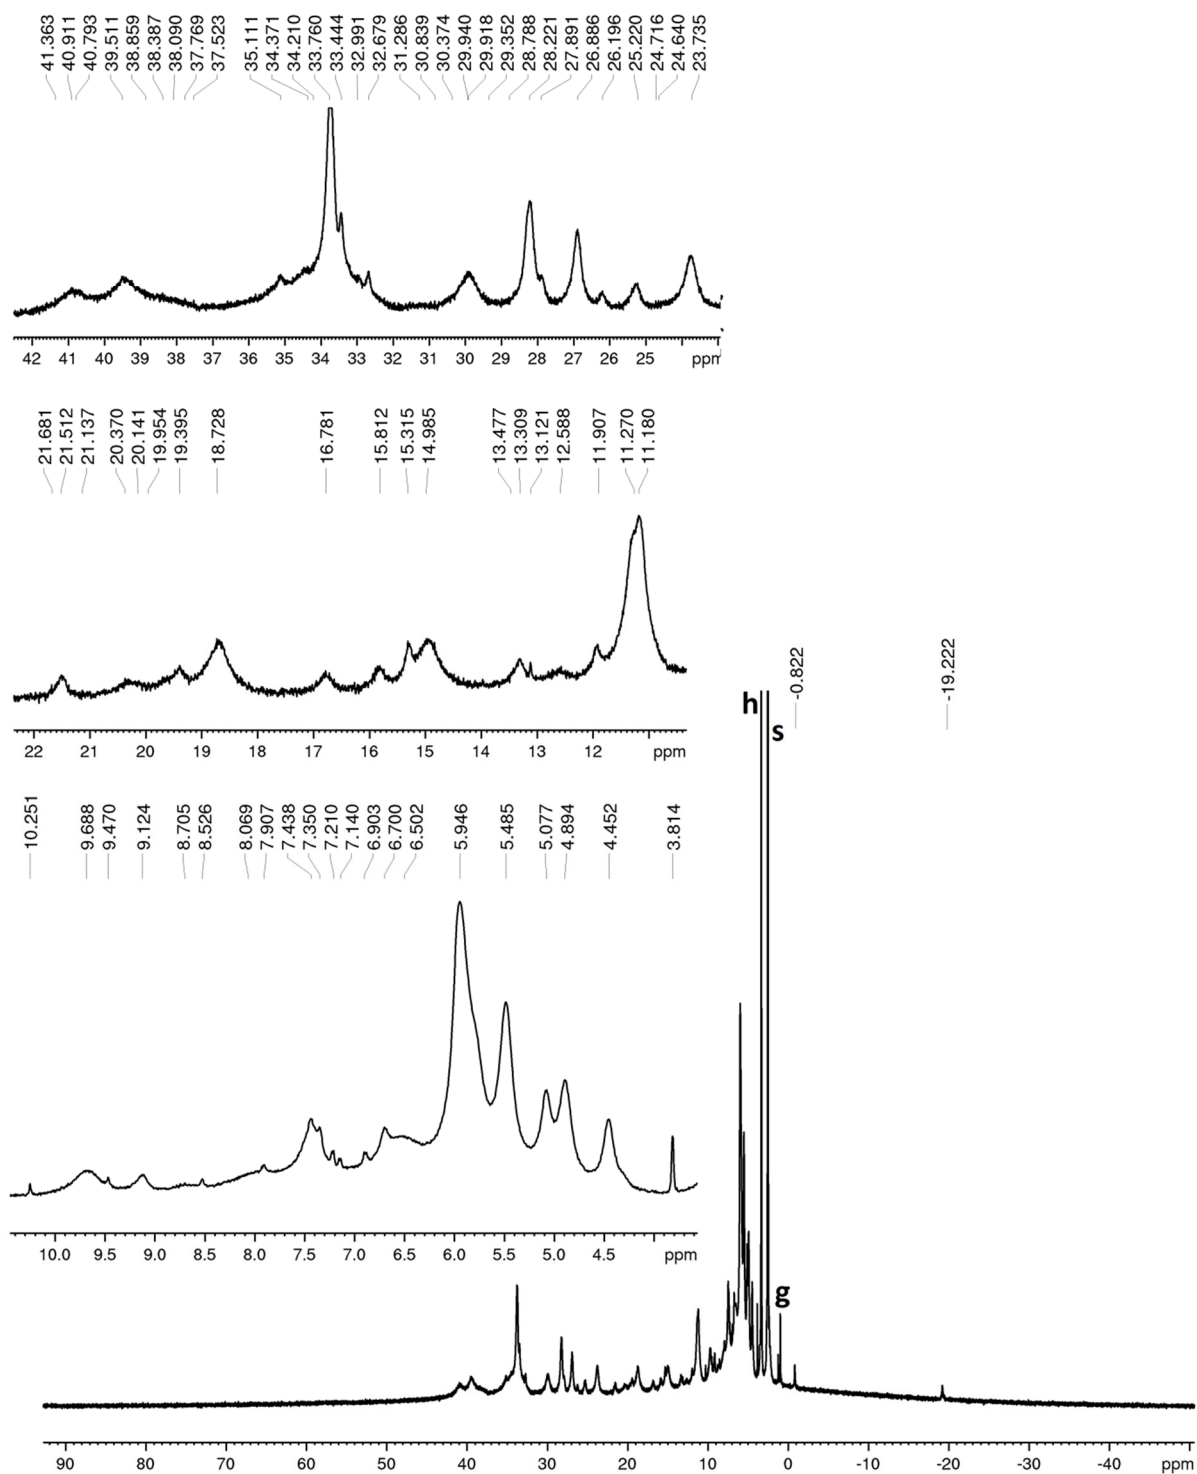

**Figure S6.** <sup>1</sup>H NMR of **1** at room temperature in DMSO-*d*<sub>6</sub>. Abbreviations in the figure: **g**—grease, **h**—H<sub>2</sub>O in deuterated solvent DMSO-*d*<sub>6</sub>, **s**—residual signal of deuterated solvent DMSO-*d*<sub>6</sub>.

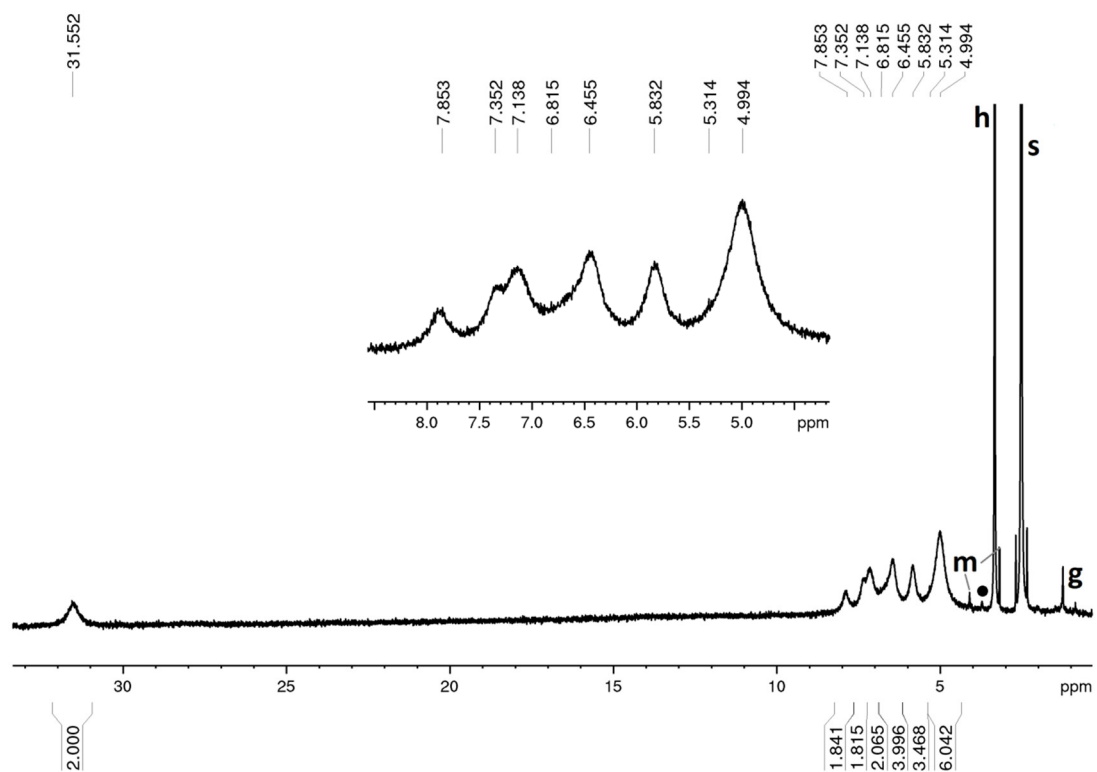

**Figure S7.**  $^1\text{H}$  NMR of **3** at room temperature in  $\text{DMSO-}d_6$ . Abbreviations in the figure: **g**—grease, **h**— $\text{H}_2\text{O}$  in deuterated solvent  $\text{DMSO-}d_6$ , **m**—methanol, **s**—residual signal of deuterated solvent  $\text{DMSO-}d_6$ , •—unidentified compound.

**$^1\text{H}$  NMR spectra for the effective magnetic moment determination in solution**  
**(Evans method)**

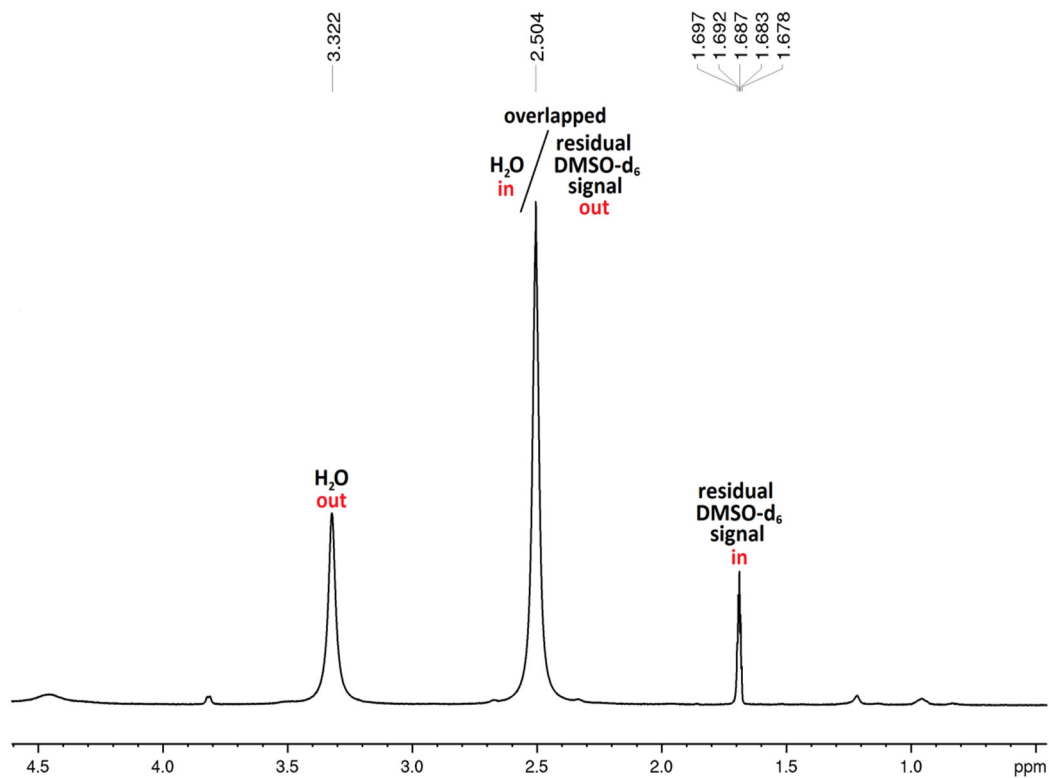

**Figure S8.**  $^1\text{H}$  NMR of  $\text{DMSO-}d_6$  in the presence of paramagnetic compound **1** solution in  $\text{DMSO-}d_6$  at room temperature. Abbreviations in the figure: **out**—outer tube, **in**—inner tube/capillary.

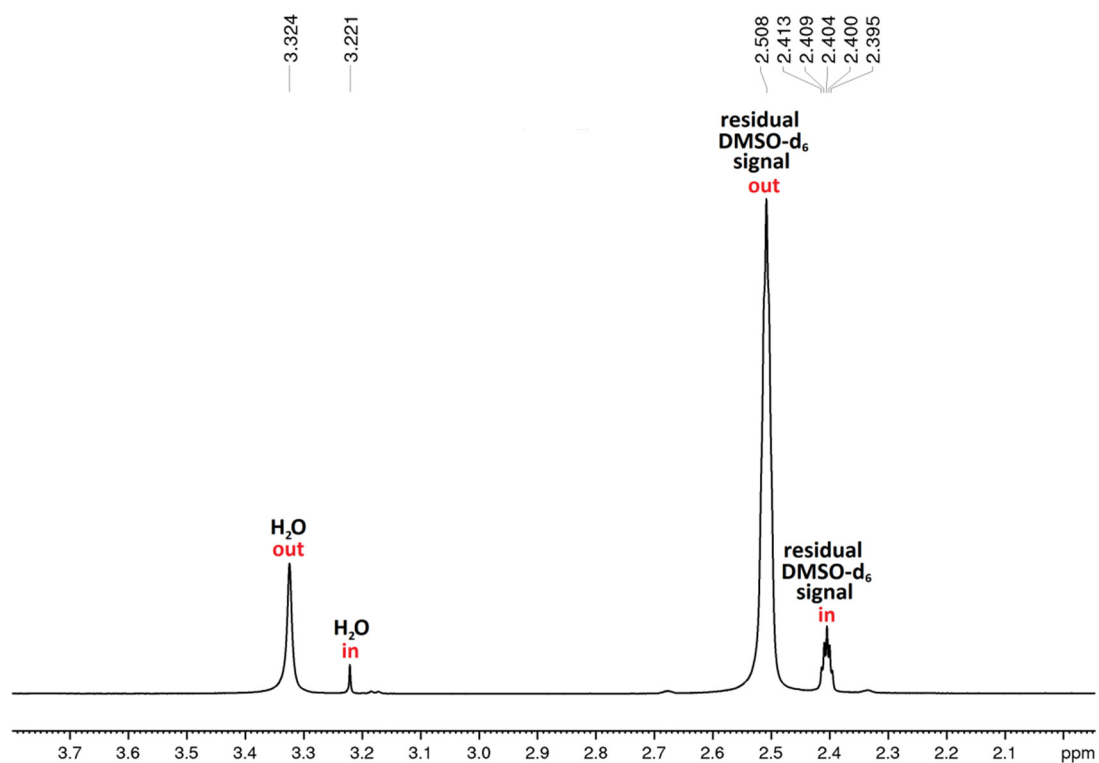

**Figure S9.**  $^1\text{H}$  NMR of DMSO- $d_6$  in the presence of paramagnetic compound **3** solution in DMSO- $d_6$  at room temperature. Abbreviations in the figure: **out** – outer tube, **in** – inner tube/capillary.

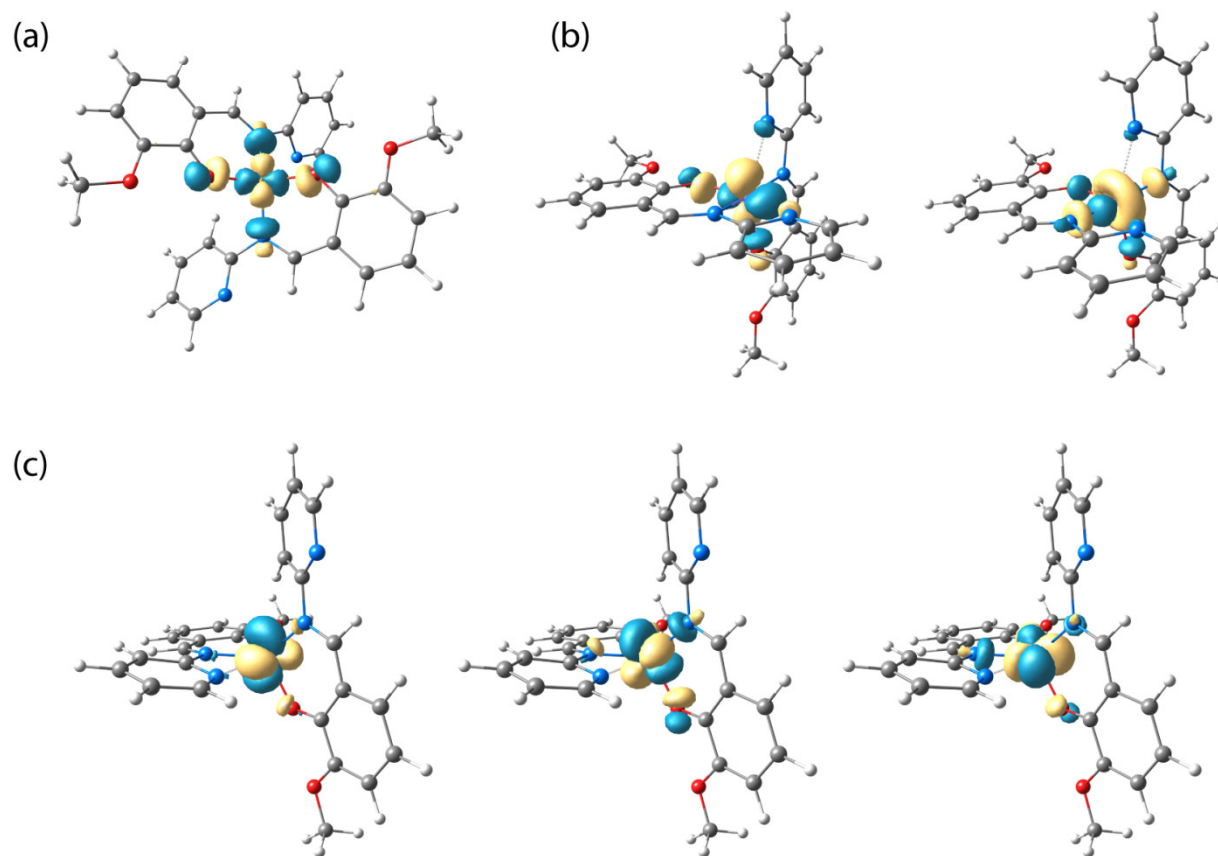

**Figure S10.** Singly occupied orbitals of the  $\text{M}(\text{L}1)_2$  models of (a) Cu, (b) Ni, and (c) Co.
